# Supplementary material for: Equation of state and high-pressure phase behaviour of SrCO&lt;sub&gt;3&lt;/sub&gt;
Source: Copernicus journal article supplement (doi:10.5194/ejm-32-575-2020), 2020-11-03
Supplement: Supplementary file 1 [file ejm-32-575-2020-supplement.zip]

Archive with 3 entries (3 files):
- EMP_analysis_MA393.pdf
- ejm-32-575-2020-supplement-title-page.pdf
- CSD_1944794.cif
