# Supplementary material for: Equation of state and high-pressure phase behaviour of SrCO&lt;sub&gt;3&lt;/sub&gt;
Source: Copernicus journal article supplement (doi:10.5194/ejm-32-575-2020), 2020-11-03
Supplement: Supplementary file 1 [file ejm-32-575-2020-supplement.zip › CSD_1944794.cif]

 
data_SrCO3_26_3GPa

_publ_requested_journal          'Physics and Chemistry of Minerals'

_publ_contact_author_name        'Elena Bykova'
_publ_contact_author_address     
;Bayerisches Geoinstitut
University of Bayreuth, Universitaetsstrasse 30
Bayreuth, D-95440
Germany
;
_publ_contact_author_email       elena.bykova@desy.de
_publ_contact_author_phone       49(0)4089985674


_audit_creation_method           SHELXL-2014/7
_shelx_SHELXL_version_number     2014/7
_chemical_name_systematic        'Strontium carbonate'
_chemical_name_common            strontianite
_chemical_formula_moiety         'C O3, Sr'
_chemical_formula_sum            'C O3 Sr'
_chemical_compound_source        'high-pressure synthesis'
_chemical_melting_point          ?

_exptl_crystal_description       prism
_exptl_crystal_colour            colorless
_diffrn_ambient_temperature      296(2)
_diffrn_ambient_pressure         26300000
_chemical_formula_weight         147.63

loop_
_atom_type_symbol
_atom_type_description
_atom_type_scat_dispersion_real
_atom_type_scat_dispersion_imag
_atom_type_scat_source
C C -0.0010 0.0002 'International Tables Vol C Tables 4.2.6.8 and 6.1.1.4'
O O -0.0010 0.0008 'International Tables Vol C Tables 4.2.6.8 and 6.1.1.4'
Sr Sr 0.2302 0.6934 'International Tables Vol C Tables 4.2.6.8 and 6.1.1.4'

_space_group_crystal_system      orthorhombic
_space_group_IT_number           59
_space_group_name_H-M_alt        'P m m n'
_space_group_name_Hall           '-P 2ab 2a'
_chemical_absolute_configuration ?

loop_
_space_group_symop_operation_xyz
'x, y, z'
'-x+1/2, -y+1/2, z'
'x+1/2, -y, -z'
'-x, y+1/2, -z'
'-x, -y, -z'
'x-1/2, y-1/2, -z'
'-x-1/2, y, z'
'x, -y-1/2, z'

_shelx_space_group_comment       
;
The symmetry employed for this shelxl refinement is uniquely defined
by the following loop, which should always be used as a source of
symmetry information in preference to the above space-group names.
They are only intended as comments.
;

_cell_length_a                   4.543(2)
_cell_length_b                   4.939(2)
_cell_length_c                   4.232(2)
_cell_angle_alpha                90
_cell_angle_beta                 90
_cell_angle_gamma                90
_cell_volume                     94.97(8)
_cell_formula_units_Z            2
_cell_measurement_temperature    296(2)
_cell_measurement_reflns_used    95
_cell_measurement_theta_min      2.5860
_cell_measurement_theta_max      13.0220
_exptl_crystal_density_meas      ?
_exptl_crystal_density_method    ?
_exptl_crystal_density_diffrn    5.163
_exptl_crystal_F_000             136
_exptl_transmission_factor_min   ?
_exptl_transmission_factor_max   ?
_exptl_crystal_size_max          0.03
_exptl_crystal_size_mid          0.03
_exptl_crystal_size_min          0.01
_exptl_absorpt_coefficient_mu    2.565
_shelx_estimated_absorpt_T_min   ?
_shelx_estimated_absorpt_T_max   ?
_exptl_absorpt_correction_T_min  0.38852
_exptl_absorpt_correction_T_max  1.00000
_exptl_absorpt_correction_type   multi-scan
_exptl_absorpt_process_details   
;
CrysAlisPro 1.171.40.57a (Rigaku Oxford Diffraction, 2019)
Empirical absorption correction using spherical harmonics,
 implemented in SCALE3 ABSPACK scaling algorithm.

Empirical correction (ABSPACK) includes:
- Absorption correction using spherical harmonics
- Frame scaling
;
_diffrn_radiation_probe          x-ray
_diffrn_radiation_type           synchrotron
_diffrn_radiation_wavelength     0.291

_diffrn_source                   synchrotron
_diffrn_source_type              'PETRAIII, Beamline P02.2'
_diffrn_measurement_device_type  
;
customized \w-circle diffractometer
;
_diffrn_measurement_method       '\w scans'


_diffrn_detector                 'Flat panel'
_diffrn_detector_area_resol_mean 5.0
_diffrn_detector_type            'Perkin Elmer XRD1621'
_diffrn_reflns_number            256
_diffrn_reflns_av_unetI/netI     0.0156
_diffrn_reflns_av_R_equivalents  0.0140
_diffrn_reflns_limit_h_min       -4
_diffrn_reflns_limit_h_max       5
_diffrn_reflns_limit_k_min       -7
_diffrn_reflns_limit_k_max       8
_diffrn_reflns_limit_l_min       -5
_diffrn_reflns_limit_l_max       6
_diffrn_reflns_theta_min         2.595
_diffrn_reflns_theta_max         15.947
_diffrn_reflns_theta_full        10.500
_diffrn_measured_fraction_theta_max 0.362
_diffrn_measured_fraction_theta_full 0.541
_diffrn_reflns_Laue_measured_fraction_max 0.362
_diffrn_reflns_Laue_measured_fraction_full 0.541
_diffrn_reflns_point_group_measured_fraction_max 0.362
_diffrn_reflns_point_group_measured_fraction_full 0.541
_reflns_number_total             142
_reflns_number_gt                136
_reflns_threshold_expression     'I > 2\s(I)'
_reflns_Friedel_coverage         0.000
_reflns_Friedel_fraction_max     .
_reflns_Friedel_fraction_full    .

_reflns_special_details          
;
 Reflections were merged by SHELXL according to the crystal
 class for the calculation of statistics and refinement.
 
 _reflns_Friedel_fraction is defined as the number of unique
 Friedel pairs measured divided by the number that would be
 possible theoretically, ignoring centric projections and
 systematic absences.
;


_computing_data_collection       'CrysAlisPro 1.171.40.57a (Rigaku OD, 2019)'
_computing_cell_refinement       'CrysAlisPro 1.171.40.57a (Rigaku OD, 2019)'
_computing_data_reduction        'CrysAlisPro 1.171.40.57a (Rigaku OD, 2019)'
_computing_structure_solution    'SHELXT-2014/5 (Sheldrick, 2015)'

_computing_structure_refinement  'SHELXL-2014/7 (Sheldrick, 2014)'
_computing_molecular_graphics    ?
_computing_publication_material  ?
_refine_special_details          ?
_refine_ls_structure_factor_coef Fsqd
_refine_ls_matrix_type           full
_refine_ls_weighting_scheme      calc
_refine_ls_weighting_details     
'w=1/[\s^2^(Fo^2^)+(0.1109P)^2^+1.5494P] where P=(Fo^2^+2Fc^2^)/3'
_atom_sites_solution_primary     dual
_atom_sites_solution_secondary   difmap

_refine_ls_extinction_method     none
_refine_ls_extinction_coef       .
_refine_ls_number_reflns         142
_refine_ls_number_parameters     19
_refine_ls_number_restraints     0
_refine_ls_R_factor_all          0.0759
_refine_ls_R_factor_gt           0.0708
_refine_ls_wR_factor_ref         0.1955
_refine_ls_wR_factor_gt          0.1922
_refine_ls_goodness_of_fit_ref   1.369
_refine_ls_restrained_S_all      1.369
_refine_ls_shift/su_max          0.000
_refine_ls_shift/su_mean         0.000

loop_
_atom_site_label
_atom_site_type_symbol
_atom_site_fract_x
_atom_site_fract_y
_atom_site_fract_z
_atom_site_U_iso_or_equiv
_atom_site_adp_type
_atom_site_occupancy
_atom_site_site_symmetry_order
_atom_site_calc_flag
_atom_site_refinement_flags_posn
_atom_site_refinement_flags_adp
_atom_site_refinement_flags_occupancy
_atom_site_disorder_assembly
_atom_site_disorder_group
Sr1 Sr 0.2500 -0.2500 0.6186(4) 0.0203(9) Uani 1 4 d S T P . .
C1 C 0.2500 0.2500 0.991(4) 0.019(6) Uani 1 4 d S T P . .
O1 O 0.2500 0.2500 0.682(3) 0.015(3) Uani 1 4 d S T P . .
O2 O 0.2500 0.025(2) 0.146(2) 0.016(3) Uani 1 2 d S T P . .

loop_
_atom_site_aniso_label
_atom_site_aniso_U_11
_atom_site_aniso_U_22
_atom_site_aniso_U_33
_atom_site_aniso_U_23
_atom_site_aniso_U_13
_atom_site_aniso_U_12
Sr1 0.036(2) 0.0096(8) 0.0152(10) 0.000 0.000 0.000
C1 0.04(2) 0.010(5) 0.007(8) 0.000 0.000 0.000
O1 0.029(12) 0.005(4) 0.011(6) 0.000 0.000 0.000
O2 0.026(11) 0.012(3) 0.009(4) 0.000(2) 0.000 0.000

_geom_special_details            
;
 All esds (except the esd in the dihedral angle between two l.s. planes)
 are estimated using the full covariance matrix.  The cell esds are taken
 into account individually in the estimation of esds in distances, angles
 and torsion angles; correlations between esds in cell parameters are only
 used when they are defined by crystal symmetry.  An approximate (isotropic)
 treatment of cell esds is used for estimating esds involving l.s. planes.
;

loop_
_geom_bond_atom_site_label_1
_geom_bond_atom_site_label_2
_geom_bond_distance
_geom_bond_site_symmetry_2
_geom_bond_publ_flag
Sr1 O2 2.417(10) 2_545 ?
Sr1 O2 2.417(10) . ?
Sr1 O1 2.4842(19) . ?
Sr1 O1 2.4842(19) 1_545 ?
Sr1 O1 2.604(7) 5_556 ?
Sr1 O1 2.604(7) 5_656 ?
Sr1 O2 2.611(10) 1_556 ?
Sr1 O2 2.611(10) 2_546 ?
Sr1 O2 2.719(6) 5_656 ?
Sr1 O2 2.719(6) 6_556 ?
Sr1 O2 2.719(6) 6_656 ?
Sr1 O2 2.719(6) 5_556 ?
C1 O2 1.291(13) 2_556 ?
C1 O2 1.291(13) 1_556 ?
C1 O1 1.31(2) . ?
C1 Sr1 2.808(10) 5_657 ?
C1 Sr1 2.808(10) 5_557 ?
C1 Sr1 2.931(9) 1_565 ?
O1 Sr1 2.4842(19) 1_565 ?
O1 Sr1 2.604(7) 5_556 ?
O1 Sr1 2.604(7) 5_656 ?
O2 C1 1.291(13) 1_554 ?
O2 Sr1 2.611(10) 1_554 ?
O2 Sr1 2.719(6) 5_656 ?
O2 Sr1 2.719(6) 5_556 ?

loop_
_geom_angle_atom_site_label_1
_geom_angle_atom_site_label_2
_geom_angle_atom_site_label_3
_geom_angle
_geom_angle_site_symmetry_1
_geom_angle_site_symmetry_3
_geom_angle_publ_flag
O2 Sr1 O2 68.3(5) 2_545 . ?
O2 Sr1 O1 130.4(4) 2_545 . ?
O2 Sr1 O1 62.1(4) . . ?
O2 Sr1 O1 62.1(4) 2_545 1_545 ?
O2 Sr1 O1 130.4(4) . 1_545 ?
O1 Sr1 O1 167.5(7) . 1_545 ?
O2 Sr1 O1 66.1(2) 2_545 5_556 ?
O2 Sr1 O1 66.1(2) . 5_556 ?
O1 Sr1 O1 93.05(19) . 5_556 ?
O1 Sr1 O1 93.05(19) 1_545 5_556 ?
O2 Sr1 O1 66.1(2) 2_545 5_656 ?
O2 Sr1 O1 66.1(2) . 5_656 ?
O1 Sr1 O1 93.05(19) . 5_656 ?
O1 Sr1 O1 93.05(19) 1_545 5_656 ?
O1 Sr1 O1 121.5(6) 5_556 5_656 ?
O2 Sr1 O2 177.2(2) 2_545 1_556 ?
O2 Sr1 O2 114.6(4) . 1_556 ?
O1 Sr1 O2 52.5(4) . 1_556 ?
O1 Sr1 O2 115.1(4) 1_545 1_556 ?
O1 Sr1 O2 114.7(2) 5_556 1_556 ?
O1 Sr1 O2 114.7(2) 5_656 1_556 ?
O2 Sr1 O2 114.6(4) 2_545 2_546 ?
O2 Sr1 O2 177.2(2) . 2_546 ?
O1 Sr1 O2 115.1(4) . 2_546 ?
O1 Sr1 O2 52.5(4) 1_545 2_546 ?
O1 Sr1 O2 114.7(2) 5_556 2_546 ?
O1 Sr1 O2 114.7(2) 5_656 2_546 ?
O2 Sr1 O2 62.6(4) 1_556 2_546 ?
O2 Sr1 O2 122.23(15) 2_545 5_656 ?
O2 Sr1 O2 94.2(2) . 5_656 ?
O1 Sr1 O2 63.5(2) . 5_656 ?
O1 Sr1 O2 111.5(3) 1_545 5_656 ?
O1 Sr1 O2 155.2(2) 5_556 5_656 ?
O1 Sr1 O2 56.7(3) 5_656 5_656 ?
O2 Sr1 O2 58.26(19) 1_556 5_656 ?
O2 Sr1 O2 84.22(13) 2_546 5_656 ?
O2 Sr1 O2 94.2(2) 2_545 6_556 ?
O2 Sr1 O2 122.23(15) . 6_556 ?
O1 Sr1 O2 111.5(3) . 6_556 ?
O1 Sr1 O2 63.5(2) 1_545 6_556 ?
O1 Sr1 O2 56.7(3) 5_556 6_556 ?
O1 Sr1 O2 155.2(2) 5_656 6_556 ?
O2 Sr1 O2 84.22(13) 1_556 6_556 ?
O2 Sr1 O2 58.26(19) 2_546 6_556 ?
O2 Sr1 O2 137.0(4) 5_656 6_556 ?
O2 Sr1 O2 94.2(2) 2_545 6_656 ?
O2 Sr1 O2 122.23(15) . 6_656 ?
O1 Sr1 O2 111.5(3) . 6_656 ?
O1 Sr1 O2 63.5(2) 1_545 6_656 ?
O1 Sr1 O2 155.2(2) 5_556 6_656 ?
O1 Sr1 O2 56.7(3) 5_656 6_656 ?
O2 Sr1 O2 84.22(13) 1_556 6_656 ?
O2 Sr1 O2 58.26(19) 2_546 6_656 ?
O2 Sr1 O2 48.3(4) 5_656 6_656 ?
O2 Sr1 O2 113.3(4) 6_556 6_656 ?
O2 Sr1 O2 122.23(15) 2_545 5_556 ?
O2 Sr1 O2 94.2(2) . 5_556 ?
O1 Sr1 O2 63.5(2) . 5_556 ?
O1 Sr1 O2 111.5(3) 1_545 5_556 ?
O1 Sr1 O2 56.7(3) 5_556 5_556 ?
O1 Sr1 O2 155.2(2) 5_656 5_556 ?
O2 Sr1 O2 58.26(19) 1_556 5_556 ?
O2 Sr1 O2 84.22(13) 2_546 5_556 ?
O2 Sr1 O2 113.3(4) 5_656 5_556 ?
O2 Sr1 O2 48.3(4) 6_556 5_556 ?
O2 Sr1 O2 137.0(4) 6_656 5_556 ?
O2 C1 O2 119.2(16) 2_556 1_556 ?
O2 C1 O1 120.4(8) 2_556 . ?
O2 C1 O1 120.4(8) 1_556 . ?
O2 C1 Sr1 72.7(5) 2_556 5_657 ?
O2 C1 Sr1 72.7(5) 1_556 5_657 ?
O1 C1 Sr1 126.0(3) . 5_657 ?
O2 C1 Sr1 72.7(5) 2_556 5_557 ?
O2 C1 Sr1 72.7(5) 1_556 5_557 ?
O1 C1 Sr1 126.0(3) . 5_557 ?
Sr1 C1 Sr1 108.0(6) 5_657 5_557 ?
O2 C1 Sr1 63.0(6) 2_556 1_565 ?
O2 C1 Sr1 177.8(11) 1_556 1_565 ?
O1 C1 Sr1 57.4(3) . 1_565 ?
Sr1 C1 Sr1 108.45(4) 5_657 1_565 ?
Sr1 C1 Sr1 108.45(4) 5_557 1_565 ?
O2 C1 Sr1 177.8(11) 2_556 . ?
O2 C1 Sr1 63.0(6) 1_556 . ?
O1 C1 Sr1 57.4(3) . . ?
Sr1 C1 Sr1 108.45(4) 5_657 . ?
Sr1 C1 Sr1 108.45(4) 5_557 . ?
Sr1 C1 Sr1 114.8(6) 1_565 . ?
C1 O1 Sr1 96.2(3) . 1_565 ?
C1 O1 Sr1 96.2(3) . . ?
Sr1 O1 Sr1 167.5(7) 1_565 . ?
C1 O1 Sr1 119.3(3) . 5_556 ?
Sr1 O1 Sr1 86.95(19) 1_565 5_556 ?
Sr1 O1 Sr1 86.95(19) . 5_556 ?
C1 O1 Sr1 119.3(3) . 5_656 ?
Sr1 O1 Sr1 86.95(19) 1_565 5_656 ?
Sr1 O1 Sr1 86.95(19) . 5_656 ?
Sr1 O1 Sr1 121.5(6) 5_556 5_656 ?
C1 O2 Sr1 154.6(9) 1_554 . ?
C1 O2 Sr1 90.9(8) 1_554 1_554 ?
Sr1 O2 Sr1 114.6(4) . 1_554 ?
C1 O2 Sr1 80.4(5) 1_554 5_656 ?
Sr1 O2 Sr1 85.8(2) . 5_656 ?
Sr1 O2 Sr1 121.74(19) 1_554 5_656 ?
C1 O2 Sr1 80.4(5) 1_554 5_556 ?
Sr1 O2 Sr1 85.8(2) . 5_556 ?
Sr1 O2 Sr1 121.74(19) 1_554 5_556 ?
Sr1 O2 Sr1 113.3(3) 5_656 5_556 ?

_refine_diff_density_max         2.378
_refine_diff_density_min         -1.723
_refine_diff_density_rms         0.602

_shelx_res_file                  
;

    C:\_Work\twin1.res created by SHELXL-2014/7

TITL twin1 in Pmmn
CELL 0.29100 4.5434 4.9389 4.2321 90.000 90.000 90.000
ZERR 2.0000 0.0021 0.0021 0.0021 0.000 0.000 0.000
LATT 1
SYMM 0.5-X, 0.5-Y, Z
SYMM 0.5+X, -Y, -Z
SYMM -X, 0.5+Y, -Z
SFAC C O SR
DISP                         Sr    0.23023    0.69341      1193.79
DISP                         C    -0.00100    0.00021         4.07
DISP                         O    -0.00099    0.00082         6.66
UNIT 2 6 2
MERG 2
FMAP 2
GRID
PLAN 20
TEMP 23
SIZE 0.03 0.03 0.01
L.S. 10
ACTA 21
WGHT    0.110900    1.549400
FVAR       0.48767
SR1   3    0.250000   -0.250000    0.618559    10.25000    0.03610    0.00962 =
         0.01517    0.00000    0.00000    0.00000
C1    1    0.250000    0.250000    0.991396    10.25000    0.04034    0.01046 =
         0.00713    0.00000    0.00000    0.00000
O1    2    0.250000    0.250000    0.682347    10.25000    0.02901    0.00490 =
         0.01114    0.00000    0.00000    0.00000
O2    2    0.250000    0.024659    0.145787    10.50000    0.02632    0.01242 =
         0.00857    0.00015    0.00000    0.00000
HKLF 4

REM  twin1 in Pmmn
REM R1 =  0.0708 for     136 Fo > 4sig(Fo)  and  0.0759 for all     142 data
REM     19 parameters refined using      0 restraints

END

WGHT      0.1109      1.5494

REM Highest difference peak  2.378,  deepest hole -1.723,  1-sigma level  0.602
Q1    1   0.1690  0.2500  0.6182  10.50000  0.05    2.38
Q2    1   0.0385 -0.2500  0.6592  10.50000  0.05    1.96
Q3    1   0.2500 -0.2116 -0.0365  10.50000  0.05    1.87
Q4    1   0.2500 -0.0505  0.1624  10.50000  0.05    1.68
Q5    1   0.3123  0.0026  0.4611  11.00000  0.05    1.37
Q6    1   0.2500 -0.3088  0.7620  10.50000  0.05    1.31
Q7    1   0.2500 -0.2500  0.8085  10.25000  0.05    1.20
Q8    1   0.2500 -0.2500  0.3884  10.25000  0.05    1.16
Q9    1   0.2500  0.0720  0.2135  10.50000  0.05    1.06
Q10   1   0.0441  0.2500  1.0008  10.50000  0.05    0.97
Q11   1  -0.0517  0.2500  0.9551  10.50000  0.05    0.95
Q12   1   0.2500  0.1770  0.3505  10.50000  0.05    0.86
Q13   1   0.5304 -0.0085  0.1778  11.00000  0.05    0.68
Q14   1   0.0239  0.3320  0.9334  11.00000  0.05    0.66
Q15   1   0.2500 -0.4830  0.6417  10.50000  0.05    0.47
Q16   1   0.1254  0.2500  1.2209  10.50000  0.05    0.23
Q17   1   0.2500 -0.3325  0.5237  10.50000  0.05    0.17
Q18   1   0.2500  0.5098  0.7997  10.50000  0.05    0.13
;
_shelx_res_checksum              66986

_shelx_hkl_file                  
;
   0   1   0    0.03    0.02
   0  -1   0   -0.01    0.01
   0   1  -1  267.64    1.44
   0  -1   1  267.93    1.47
   0   2   0  996.41    4.81
   0  -2   0  993.66    5.17
   0   2  -2   14.26    0.54
   0  -2   2   11.70    0.47
   0  -2   3  718.70    3.68
   0   3   0   -0.01    0.03
   0  -3   0   -0.03    0.03
   0  -3   1   88.44    1.53
   0   3  -1   85.10    1.47
   0  -3   2  415.17    3.40
   0   3  -2  412.93    3.06
   0  -3   3  163.84    1.88
   0  -3   4   11.40    0.48
   0   4   0  984.64    6.81
   0  -4   0  987.87    6.76
   0   4  -1  130.25    2.17
   0  -4   1  131.11    2.25
   0  -4   2    0.85    1.25
   0   4  -2    6.96    1.45
   0   4  -3   82.47    1.52
   0  -4   3   78.26    1.50
   0  -4   4  164.93    2.44
   0  -4   5   50.03    1.25
   0   5   0    0.26    0.17
   0  -5   0    0.00    0.10
   0  -5   1  104.80    2.39
   0   5  -1  110.97    2.21
   0   5  -2  105.67    1.95
   0  -5   2  106.52    2.06
   0   5  -3  115.24    2.23
   0  -5   3  112.40    2.10
   0  -5   4   12.48    0.67
   0  -5   5   24.42    0.96
   0   6   0  199.07    3.98
   0  -6   1   98.25    2.66
   0   6  -1   90.20    2.45
   0  -6   2    0.91    0.22
   0   6  -2    0.98    0.20
   0   6  -3   85.16    2.14
   0  -6   3   84.47    2.13
   0   6  -4   38.31    1.40
   0  -6   4   44.77    1.42
   0  -6   5   33.39    1.27
   0   7   0    0.33    0.20
   0  -7   1   12.88    0.92
   0   7  -1   15.11    1.05
   0  -7   2   96.18    2.40
   0   7  -2   96.23    2.34
   0  -7   3   28.58    1.41
   0   7  -3   35.33    1.48
   0  -7   4    1.86    0.33
   0   7  -4    1.99    0.36
   0  -7   5    2.92    0.43
  -1   1   1  433.34    2.32
   1  -1  -1  435.37    2.22
   1  -1  -2    6.65    0.27
  -1   1   2    6.76    0.31
  -1   1   3   60.87    1.05
  -1   2   0    0.82    0.20
   1  -2   0    0.87    0.16
   1  -2  -1 1000.00    4.79
  -1   2   1  990.52    5.08
   1   2  -2  273.57    1.68
  -1   2   2  271.12    2.54
   1  -2  -2  273.23    2.50
  -1   2   3  318.33    3.34
  -1  -2   4    6.53    0.25
  -1  -2   5   46.08    0.66
  -1  -2   6   23.96    0.46
   1  -3   0  395.12    3.79
  -1   3   0  399.48    3.40
  -1   3   1  210.80    2.67
   1  -3  -1  203.97    2.64
  -1   3  -1  207.00    2.69
   1  -3   1  207.98    2.37
   1  -3   2    1.44    0.21
  -1   3   2    1.76    0.26
   1  -3  -2    1.85    0.26
   1   3  -2    1.73    0.17
   1   3  -3   21.31    0.60
  -1  -3   3   22.45    0.63
  -1  -3   4  184.35    1.73
  -1  -3   5   58.98    0.90
  -1   4   0    3.08    1.32
  -1   4  -1  150.62    2.44
   1  -4  -1  147.49    2.73
   1  -4   1  153.20    2.63
   1  -4  -2  479.80    4.75
  -1   4   2  484.95    5.01
  -1   4  -2  486.47    4.12
   1  -4   2  485.09    4.20
   1   4  -3   79.67    1.30
  -1  -4   3   79.39    1.38
   1  -4   3   76.68    1.60
   1   4  -4   16.25    0.79
  -1  -4   4   -0.28    0.56
  -1  -4   5   16.07    0.70
  -1   5   0   98.23    2.34
   1  -5   0  101.85    2.39
  -1   5  -1  170.66    3.24
   1  -5   1  175.22    2.94
  -1   5   1  185.08    3.45
   1  -5  -1  190.21    3.71
   1  -5   2    2.11    0.36
   1   5  -2    3.48    0.50
  -1   5  -2    1.90    0.32
  -1   5   2    2.70    0.49
   1  -5  -2    2.29    0.37
   1  -5   3   38.60    1.29
   1   5  -3   44.41    1.25
   1   5  -4   73.91    1.68
   1  -5   4   71.83    1.81
  -1  -5   4   72.43    1.44
  -1  -5   5   40.63    1.10
   1  -6   0   -0.06    0.04
  -1   6   0   -0.05    0.04
  -1   6  -1  105.42    2.62
  -1   6   1  108.24    2.77
   1  -6  -1  113.61    2.77
   1  -6   2  120.47    2.69
   1   6  -2  107.15    2.59
  -1   6   2  118.41    3.74
  -1   6  -2  107.79    2.74
  -1   6  -3   68.33    1.99
   1  -6   3   68.26    2.20
   1  -6   4   -0.50    0.21
   1   6  -4   -0.40    0.15
   1  -7   0   89.61    3.06
  -1   7   0   97.69    2.83
   1  -7   1   42.99    1.88
  -1   7  -1   39.37    1.80
   1  -7   2   -0.11    0.13
  -1   7  -2    0.00    0.10
   1   7  -2   -0.06    0.11
   1   7  -3    3.53    0.47
   1  -7   3    2.70    0.44
  -1   7  -3    2.05    0.37
   1   7  -4   72.31    2.13
   1  -7   4   79.21    2.37
   1  -7   5   13.46    0.96
   1   8  -4    0.00    0.59
   2   0  -3   81.44    0.70
   2  -1  -2  215.07    1.81
   2  -1  -3  146.56    1.42
  -2   1   3  147.64    1.54
  -2   1   4   13.97    0.46
  -2   1   5   22.18    0.54
  -2   1   6   52.27    0.96
   2  -2  -1  355.27    2.72
  -2   2   2    8.36    0.62
   2  -2  -2    6.08    0.47
   2  -2  -3  247.50    2.50
   2   2  -3  248.74    1.45
  -2   2   3  248.24    2.47
  -2   2   4   63.35    1.21
  -2   2   5   70.36    1.32
  -2   2   6    2.21    0.24
  -2   3   0    0.39    0.22
   2  -3   0    0.25    0.18
  -2   3   1   53.41    1.64
   2  -3  -1   53.52    1.34
  -2   3   2  236.03    2.92
   2  -3  -2  229.77    2.71
   2   3  -3   96.34    1.25
  -2   3   3   93.62    1.77
   2  -3  -3   96.30    1.92
   2   3  -4    7.27    0.30
  -2   3   4    7.29    0.51
  -2   3   5   12.92    0.68
  -2   4   0  533.61    5.54
   2  -4   0  537.70    4.83
   2  -4   1   74.39    1.96
  -2   4  -1   74.63    1.88
   2  -4  -2   12.58    0.90
  -2   4   2    6.32    0.65
   2   4  -3   59.62    1.20
  -2   4   3   60.22    1.69
  -2   4   4  104.56    2.20
   2   4  -4  105.80    1.47
  -2   4   5   39.05    1.46
  -2   5   0    0.23    0.11
   2  -5   0    0.14    0.07
  -2   5   1   70.77    2.09
   2  -5  -1   80.51    2.14
  -2   5  -1   78.80    2.10
   2  -5   1   73.15    2.01
   2  -5  -2   81.69    2.19
   2  -5   2   84.20    2.01
  -2   5   2   84.00    2.11
   2   5  -3   70.65    1.52
   2  -5  -3   73.03    2.06
  -2   5   4   10.84    0.85
   2   5  -4   10.44    0.60
   2  -6   0  128.87    3.02
  -2   6   0  144.19    3.11
   2  -6  -1   66.80    2.18
  -2   6   1   64.17    2.20
   2  -6  -2    0.52    0.16
   2  -6   2    0.76    0.20
  -2   6  -2    0.50    0.14
  -2   6   2    0.75    0.22
  -2   6   3   56.21    2.17
   2  -6  -3   56.31    2.03
   2   6  -4   35.17    1.32
  -2   6   4   41.58    1.97
   3   0  -4    5.14    0.25
   3  -1  -3   24.40    0.67
   3  -1  -4   85.82    1.20
   3  -2  -2   99.98    1.62
   3  -2  -3   86.94    1.44
   3  -2  -4    2.60    0.29
  -3   2   4    5.95    0.49
   3  -3  -2    0.95    0.18
  -3   3   2    0.94    0.24
   3  -3  -3    9.64    0.57
  -3   3   3   10.05    0.60
  -3   3   4  100.41    1.98
   3  -3  -4  103.93    1.93
  -3   3   5   38.52    1.21
  -3   3   6    4.09    0.39
  -3   4   1   60.79    1.87
   3  -4  -1   58.01    1.66
   3  -4  -2  183.87    3.11
  -3   4   2  186.58    2.90
   3  -4  -3   41.28    1.43
  -3   4   3   39.57    1.48
   3  -4  -4    2.98    0.49
  -3   4   4    1.93    0.33
  -3   4   5    5.62    0.50
  -3   4   6   30.21    1.31
   3  -5   0   47.54    1.65
  -3   5   0   48.13    1.69
   3  -5  -1   88.34    2.30
  -3   5   1   75.99    2.13
   3  -5  -2    1.02    0.23
  -3   5   2    1.13    0.27
   3  -5  -3   20.75    1.15
  -3   5   3   20.26    1.04
  -3   5   4   43.32    1.72
   3  -5  -4   41.02    1.52
  -3   5   5   25.63    1.24
  -3   5   6    6.31    0.63
   3  -6   0   -0.30    0.16
  -3   6   0   -0.05    0.07
   3  -6  -1   48.21    2.01
  -3   6   1   55.29    2.16
   3  -6  -2   53.29    2.00
  -3   6   2   48.55    1.93
  -3   6   3   32.10    1.50
  -3   6   4    8.19    0.85
   4  -1  -4    4.17    0.28
   4  -2  -4   23.85    0.83
   4  -2  -5   16.52    0.72
   4  -3  -3   35.69    1.11
   4  -3  -4    2.84    0.31
   4  -3  -5    5.22    0.47
   4  -4  -3   21.35    1.05
   4  -4  -4   38.75    1.38
  -4   4   4   37.91    1.36
  -4   4   5   16.60    0.99
   4  -4  -5   14.14    0.96
   4  -5  -2   27.75    1.22
   4  -5  -3   33.46    1.36
  -4   5   3   32.40    1.36
   4  -5  -4    3.56    0.45
  -4   5   4    3.10    0.40
  -4   5   5    8.08    0.68
   4  -5  -5    9.22    0.77
   5  -4  -4   -0.02    0.09
   5  -5  -4   11.85    0.80
   0   0   0    0.00    0.00
;
_shelx_hkl_checksum              64824

# start Validation Reply Form
_vrf_PLAT029_SrCO3_26_3GPa       
;
PROBLEM: _diffrn_measured_fraction_theta_full value Low .      0.541 Why?  
RESPONSE: The dataset was incomplete since the data were collected in
 a diamond anvil cell metallic body of which shadows
 more than 60% of the reflections.

;
_vrf_PLAT088_SrCO3_26_3GPa       
;
PROBLEM: Poor Data / Parameter Ratio ....................       7.47 Note  
RESPONSE: The dataset was incomplete since the data were collected in
 a diamond anvil cell metallic body of which shadows
 more than 60% of the reflections.

;
_vrf_PLAT911_SrCO3_26_3GPa       
;
PROBLEM: Missing FCF Refl Between Thmin & STh/L=    0.600         48 Report
RESPONSE: The dataset was incomplete since the data were collected in
 a diamond anvil cell metallic body of which shadows
 more than 60% of the reflections.

;

# end Validation Reply Form
