# Supplementary material for: Equation of state and high-pressure phase behaviour of SrCO&lt;sub&gt;3&lt;/sub&gt;
Source: Copernicus journal article supplement (doi:10.5194/ejm-32-575-2020), 2020-11-03
Supplement: Supplementary file 1 [file ejm-32-575-2020-supplement.zip › ejm-32-575-2020-supplement-title-page.pdf]

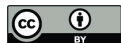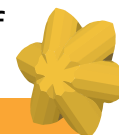

*Supplement of*

## **Equation of state and high-pressure phase behaviour of SrCO<sub>3</sub>**

**Nicole Biedermann et al.**

*Correspondence to:* Nicole Biedermann ([nicole.biedermann@xfel.eu](mailto:nicole.biedermann@xfel.eu))

- [ejm-32-575-2020-supplement-title-page.pdf](#)
- [CSD\\_1944794.cif](#)
- [EMP\\_analysis\\_MA393.pdf](#)

The copyright of individual parts of the supplement might differ from the CC BY 4.0 License.
