# Supplementary material for: Equation of state and high-pressure phase behaviour of SrCO&lt;sub&gt;3&lt;/sub&gt;
Source: Copernicus journal article supplement (doi:10.5194/ejm-32-575-2020), 2020-11-03
Supplement: Supplementary file 1 [file ejm-32-575-2020-supplement.zip › EMP_analysis_MA393.pdf]

## Equation of state and high-pressure phase behavior of SrCO<sub>3</sub>

Biedermann, N.<sup>1,2</sup>, Bykova, E.<sup>3,4</sup>, Morgenroth, W.<sup>2,5</sup>, Efthimiopoulos, I.<sup>6</sup>, Mueller, J.<sup>6</sup>, Spiekermann, G.<sup>2</sup>, Glazyrin, K.<sup>3</sup>, Pakhomova, A.<sup>3</sup>, Appel, K.<sup>1</sup> and Wilke M.<sup>2</sup>

<sup>1</sup>European XFEL GmbH, Schenefeld, Germany

<sup>2</sup>Institute for Geosciences, University of Potsdam, Potsdam-Golm, Germany

<sup>3</sup>Deutsches Elektronen Synchrotron DESY, Hamburg, Germany

<sup>4</sup>Geophysical Laboratory, Carnegie Institution of Washington, Washington, D.C., USA

<sup>5</sup>Institute for Geosciences, Goethe University of Frankfurt, Frankfurt am Main, Germany

<sup>6</sup>GFZ German Research Center for Geosciences, Potsdam, Germany,

Corresponding author: Nicole Biedermann, nicole.biedermann@xfel.eu,

### Supplementary material

The single crystals of pure SrCO<sub>3</sub> strontianite were synthesized using a Walker-type multi-anvil apparatus at 4 GPa and 1273 K for 24 h using SrCO<sub>3</sub> powder from Sigma Aldrich Chemical Company (99.995% purity) as starting material. The chemical composition of the synthesized crystals was determined using a JEOL Hyperprobe JXA-8500F with a field emission cathode at the GFZ Potsdam, Germany. Analysis was conducted with an acceleration voltage of 15 kV, a 10 nA beam current and a <10 µm focused beam size. Dolomite and strontianite were used as standard reference materials. Table S1 shows the chemical analyses of the samples with calculated CO<sub>2</sub>-contents. In addition, the morphology and chemical composition of the single crystals were studied with scanning electron microscopy (Fig. S1)

**Table S1: Chemical composition of synthesized strontianite samples.**

The composition in wt % was determined by electron microprobe analysis. The standard deviation is given in parentheses and refers to the last printed digit.

| sample         | SrO [wt%]      | CaO [wt%]      | CO <sub>2</sub> |
|----------------|----------------|----------------|-----------------|
| MA393-1        | 67.65          | 0.02           | 32.33           |
| MA393-2        | 67.27          | 0.02           | 32.71           |
| MA393-3        | 67.43          | 0.02           | 32.55           |
| MA393-4        | 67.90          | 0.02           | 32.09           |
| MA393-5        | 67.41          | 0.00           | 32.59           |
| <b>Average</b> | <b>67.5(2)</b> | <b>0.01(1)</b> | <b>32.5(2)</b>  |

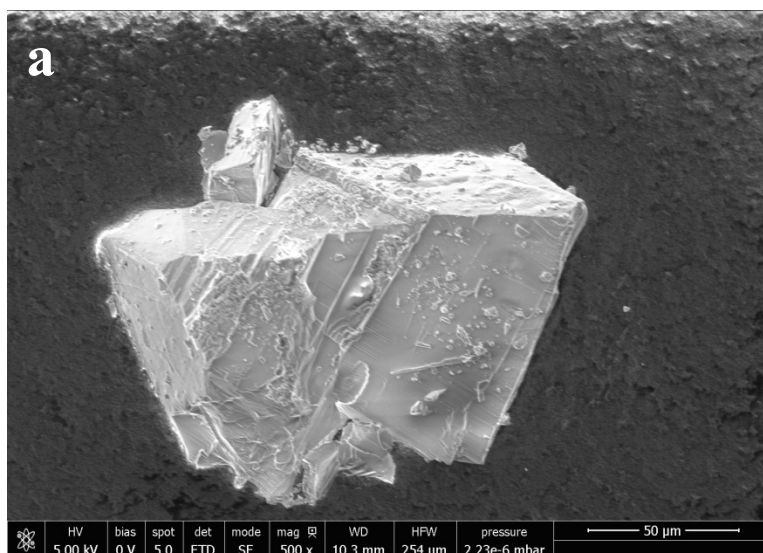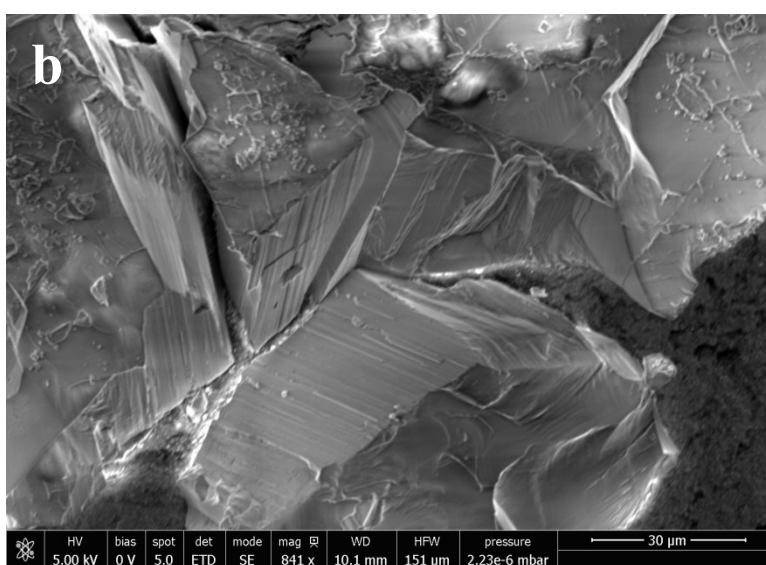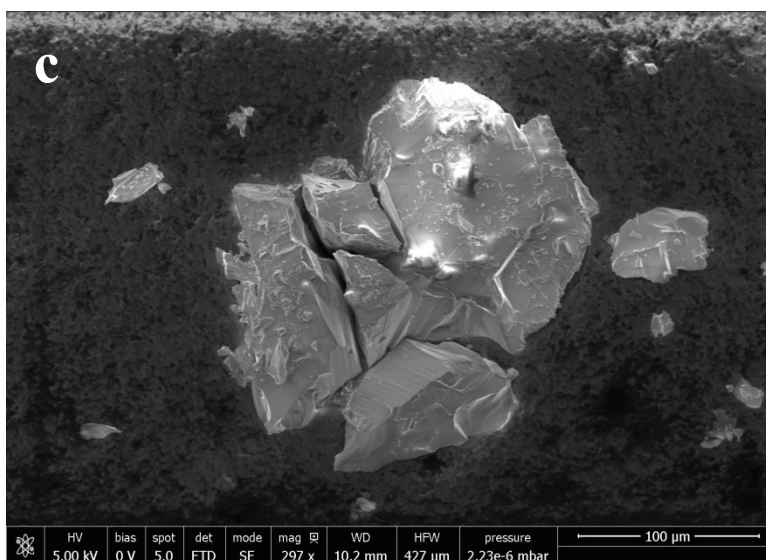

**Figure S1: Scanning electron images of synthesized strontianite.**  
 SEM imaging was performed on a QUANTA FEG 650 with 5 kV acceleration voltage.
